# Supplementary material
Source: PubMed Central journal article supplement (PMC10257152)

**Figure S1: Kaplan Meier curves for progression-free survival (PFS) with checkpoint inhibitors comparing history of Radical Surgery vs Radiation therapy vs Neither in the 1<sup>st</sup> line (A) and 2<sup>nd</sup>+ line (B) setting (RS: Radical Surgery, ICIs: Immune Checkpoint Inhibitors)**

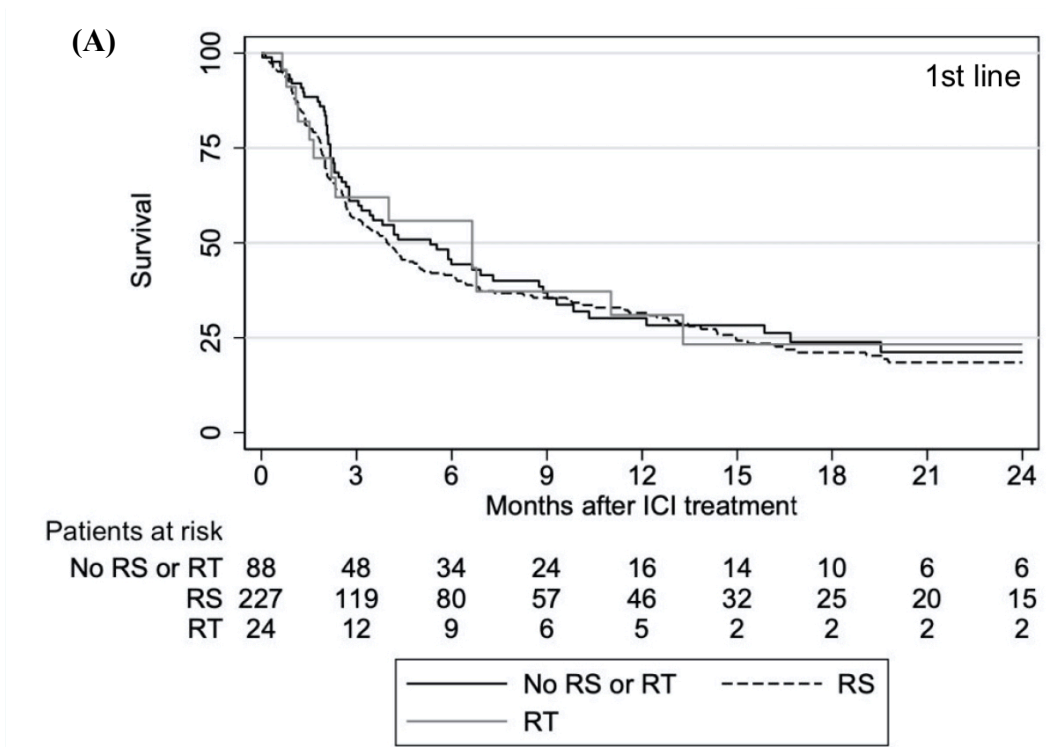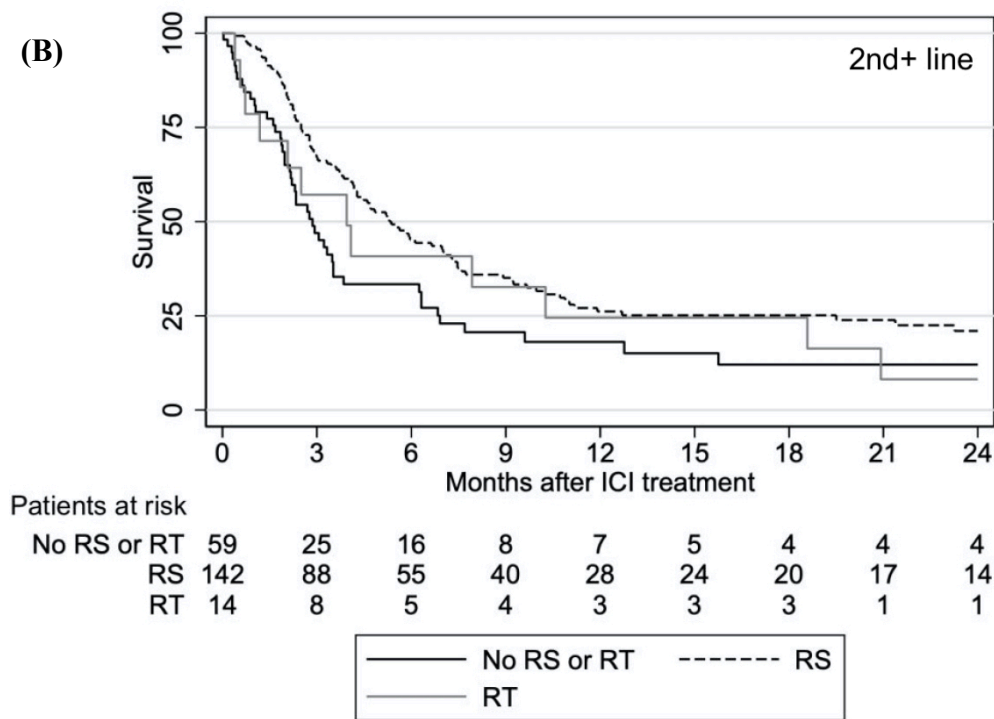

Supplement: NIHMS1900258-supplement-supplementary_Fig_1.pdf [file NIHMS1900258-supplement-supplementary_Fig_1.pdf]
